# Supplementary material for: CeO2 decorated bimetallic phosphide nanowire arrays for enhanced oxygen evolution reaction electrocatalysis via interface engineering
Source: Royal Society of Chemistry journal article supplement (doi:10.1039/d1dt03931h), 2022-01-01
Supplement: d1dt03931h1.pdf [file d1dt03931h1.pdf]

## Electronic Supplementary Information

### **CeO<sub>2</sub> Decorated Bimetallic Phosphide Nanowire Arrays for Enhanced Oxygen Evolution Reaction Electrocatalysis via Interface Engineering**

**Yikang Cong,<sup>a</sup> Xinnan Chen,<sup>a</sup> Yan Mei,<sup>a</sup> Jun Ye,<sup>a</sup> Ting-Ting Li<sup>a,b,\*</sup>**

*<sup>a</sup>School of Materials Science and Chemical Engineering, Ningbo 315211, China.*

*<sup>b</sup>Key Laboratory of Advanced Mass Spectrometry and Molecular Analysis of  
Zhejiang Province, Ningbo University, Ningbo 315211, China.*

*\*Corresponding author: [litington@nbu.edu.cn](mailto:litington@nbu.edu.cn) (T.-T. Li)*

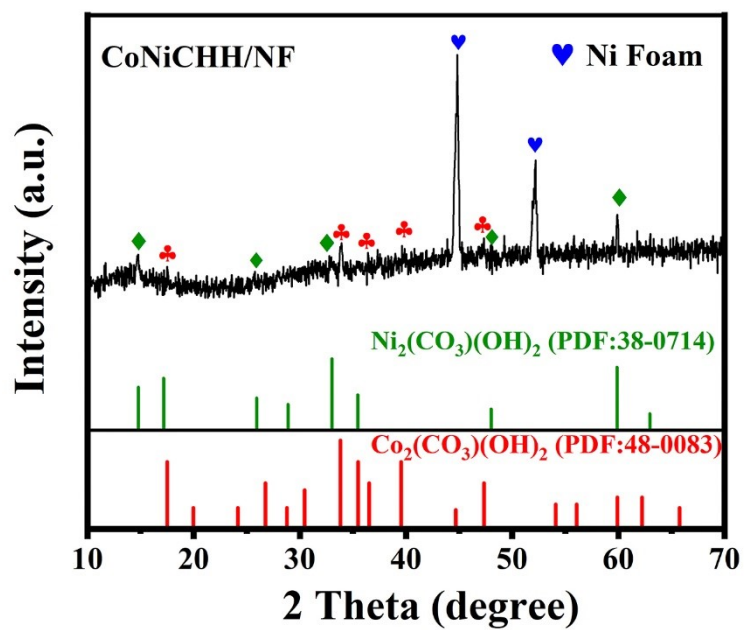

Fig. S1. XRD pattern of CoNiCHH/NF.

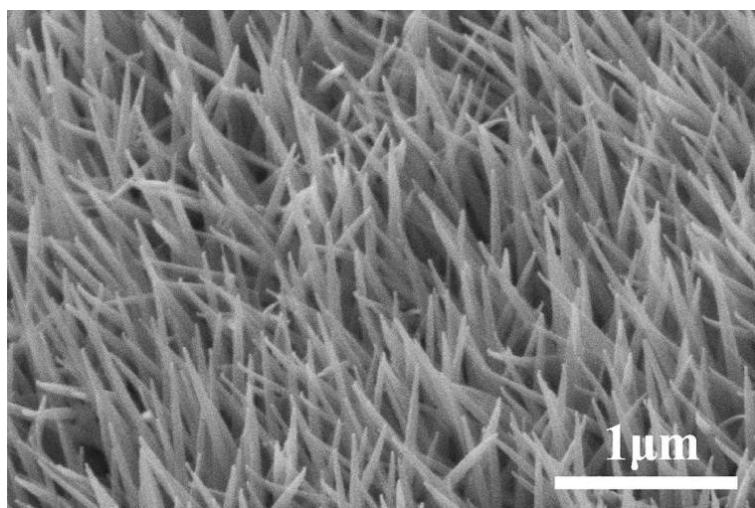

Fig. S2. SEM image of CoNiCHH/NF.

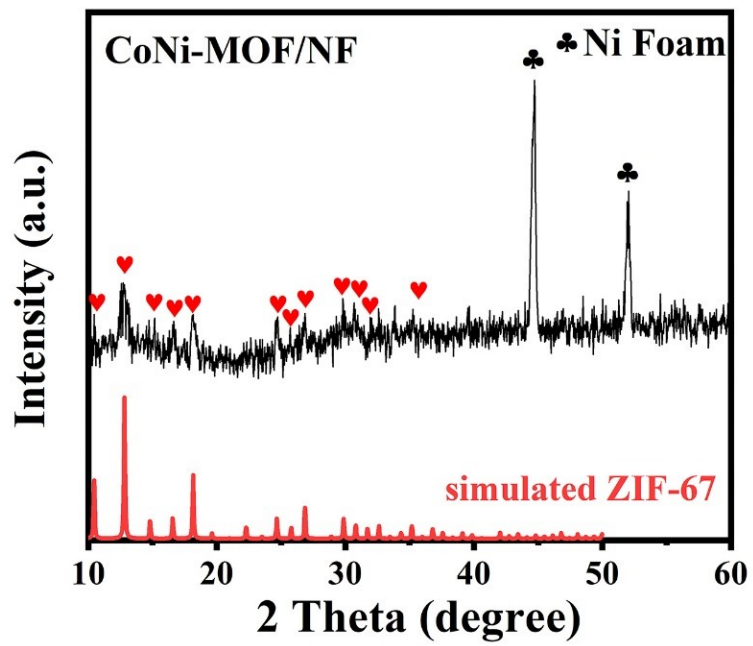

Fig. S3. XRD pattern of CoNi-MOF/NF

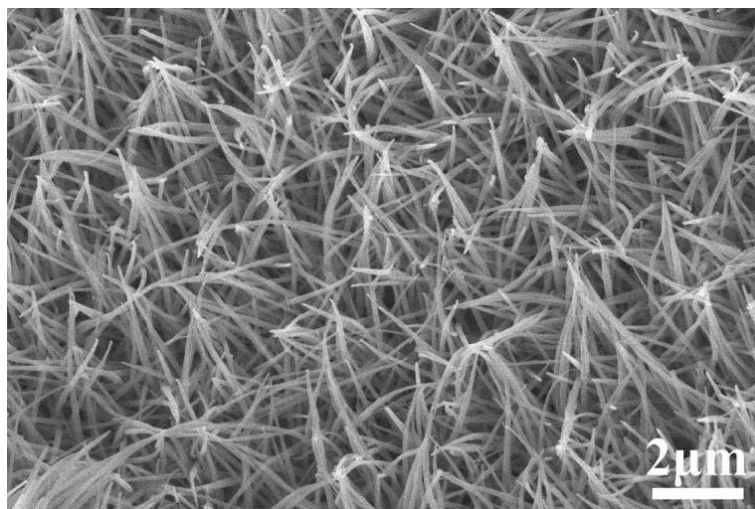

Fig. S4. SEM image of CoNi-MOF/NF.

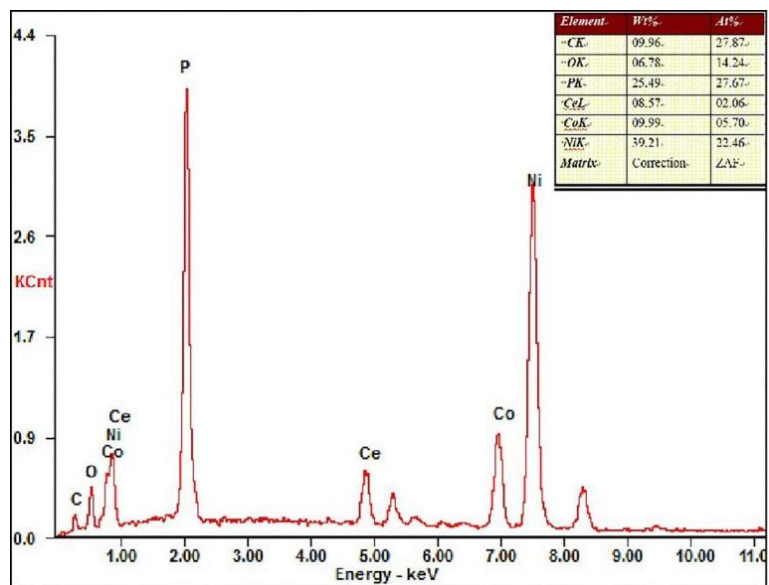

**Fig. S5.** EDX spectrum and elemental composition in  $\text{Co}_{0.4}\text{Ni}_{1.6}\text{P-CeO}_2/\text{NF}$ .

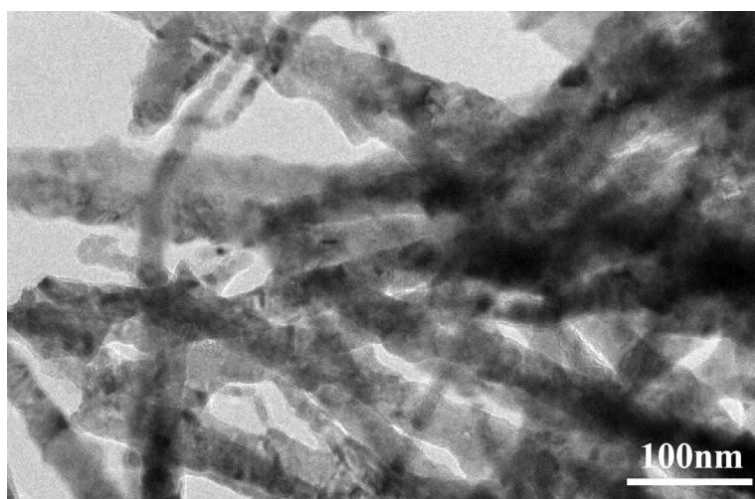

**Fig. S6.** TEM image of  $\text{Co}_{0.4}\text{Ni}_{1.6}\text{P}$ .

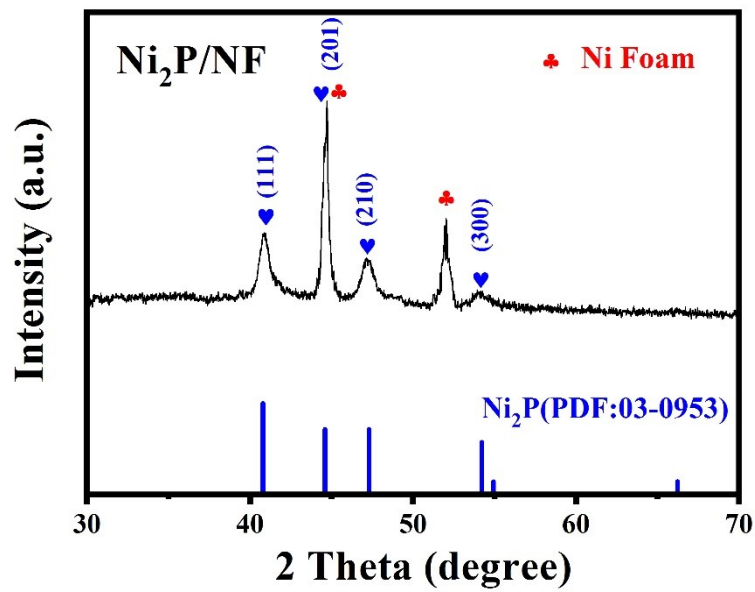

Fig. S7. XRD pattern of MOF-derived Ni<sub>2</sub>P/NF.

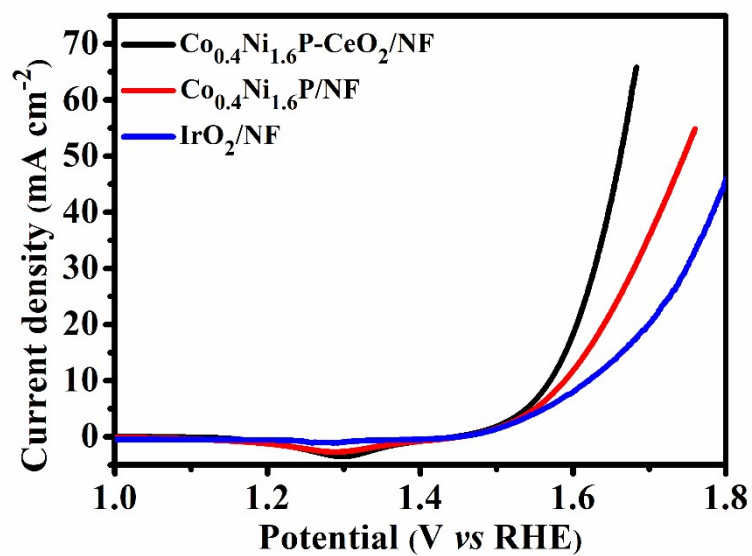

Fig. S8. The LSV plots of Co<sub>0.4</sub>Ni<sub>1.6</sub>P-CeO<sub>2</sub>/NF, Co<sub>0.4</sub>Ni<sub>1.6</sub>P/NF, and IrO<sub>2</sub>/NF in a neutral solution (0.1 M PBS, pH 6.8).

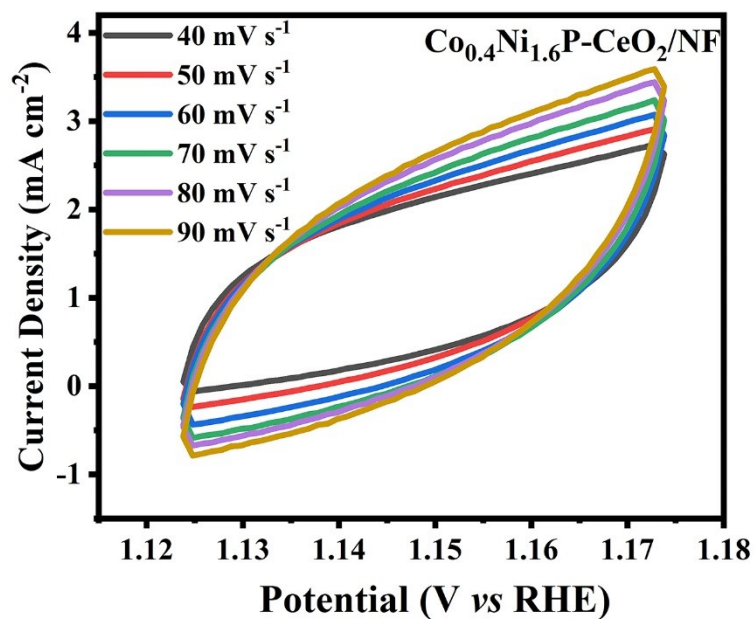

**Fig. S9.** Cyclic voltammograms of  $\text{Co}_{0.4}\text{Ni}_{1.6}\text{P-CeO}_2/\text{NF}$  measured at different scan rates.

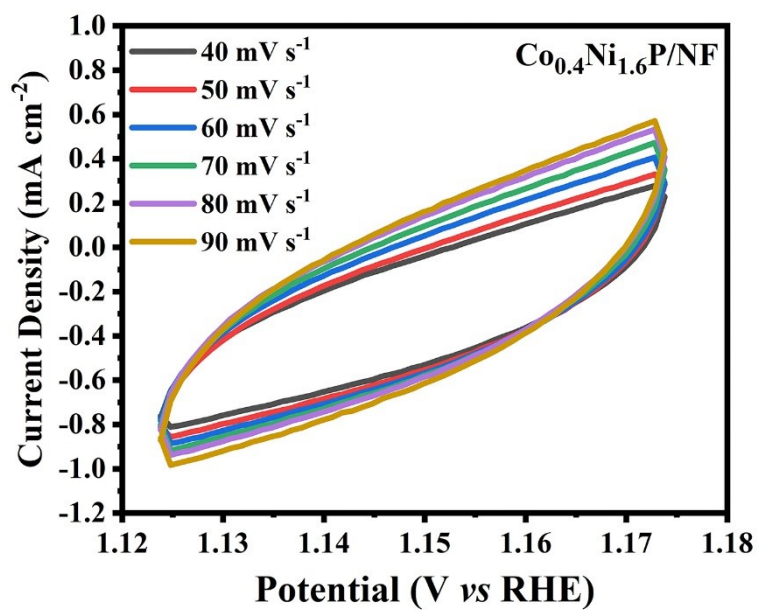

**Fig. S10.** Cyclic voltammograms of  $\text{Co}_{0.4}\text{Ni}_{1.6}\text{P/NF}$  measured at different scan rates.

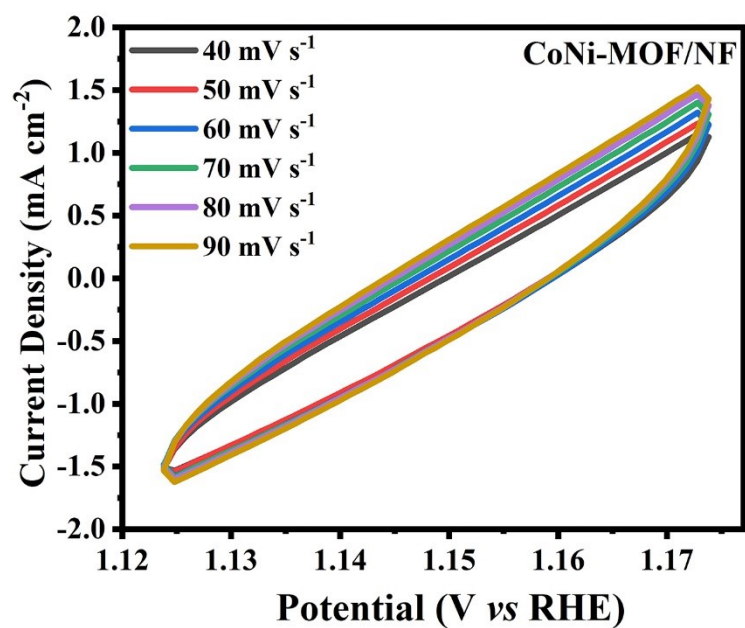

Fig. S11. Cyclic voltammograms of CoNi-MOF/NF measured at different scan rates.

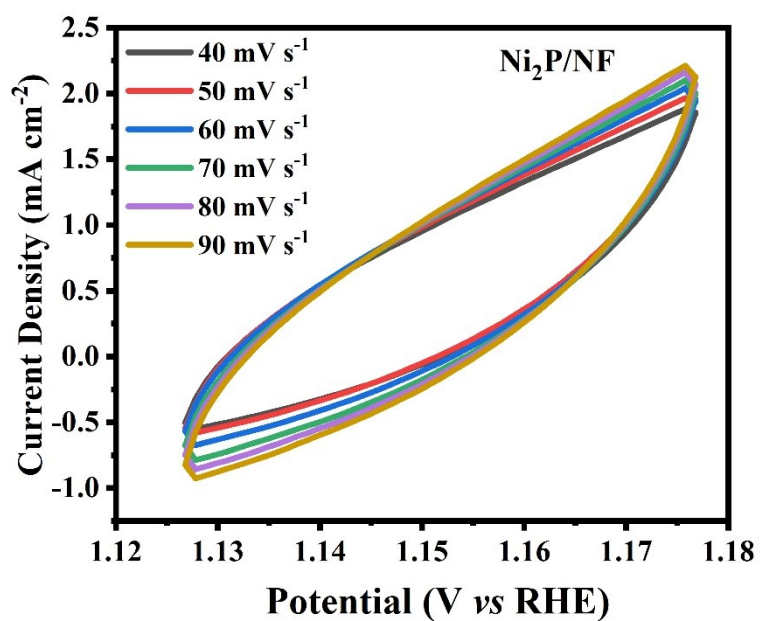

Fig. S12. Cyclic voltammograms of Ni<sub>2</sub>P/NF measured at different scan rates.

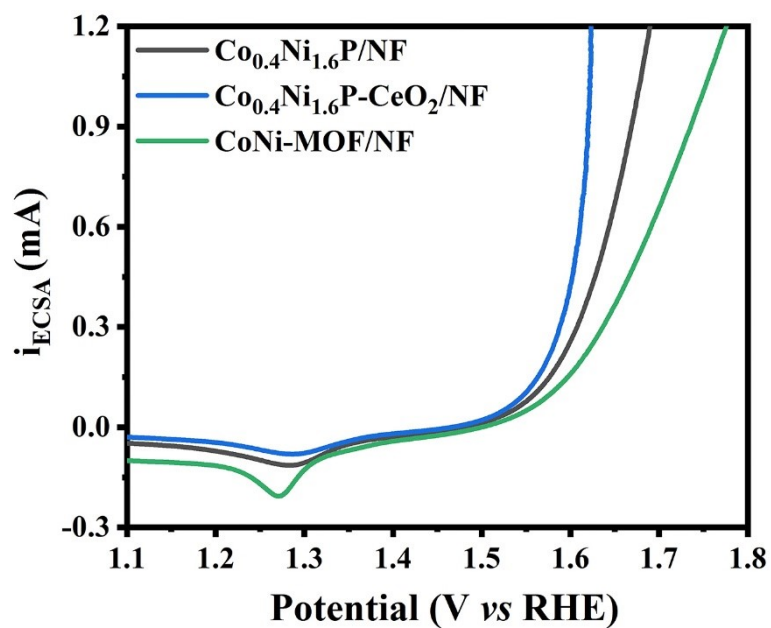

**Fig. S13.** OER polarization plots of  $\text{Co}_{0.4}\text{Ni}_{1.6}\text{P}-\text{CeO}_2/\text{NF}$ ,  $\text{Co}_{0.4}\text{Ni}_{1.6}\text{P}/\text{NF}$ , and  $\text{CoNi-MOF}/\text{NF}$  normalized by the related ECSA values.

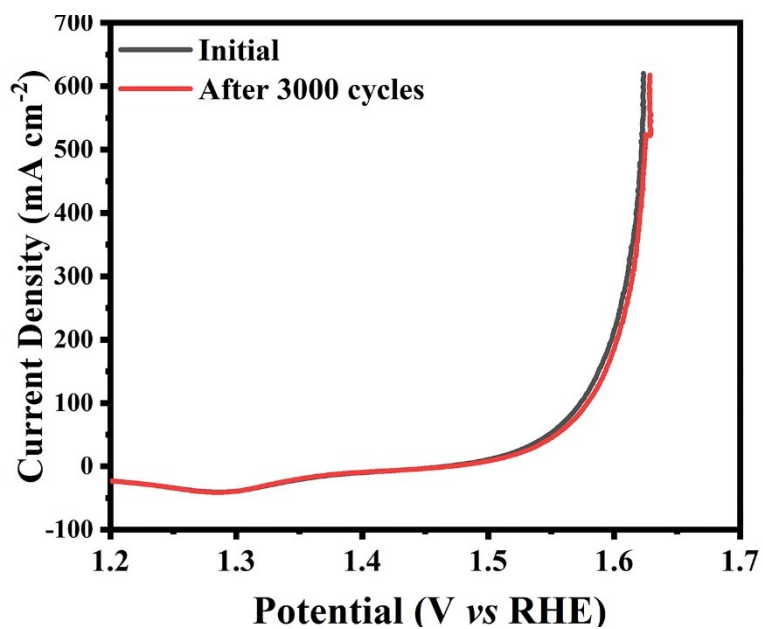

**Fig. S14.** The LSV curves recorded before and after 3000 cycles.



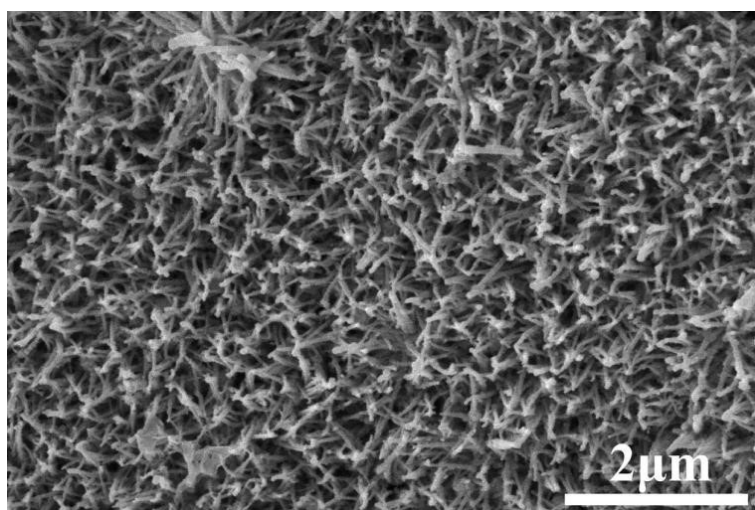

Fig. S15. SEM image of Co<sub>0.4</sub>Ni<sub>1.6</sub>P-CeO<sub>2</sub>/NF after long-term stability test.

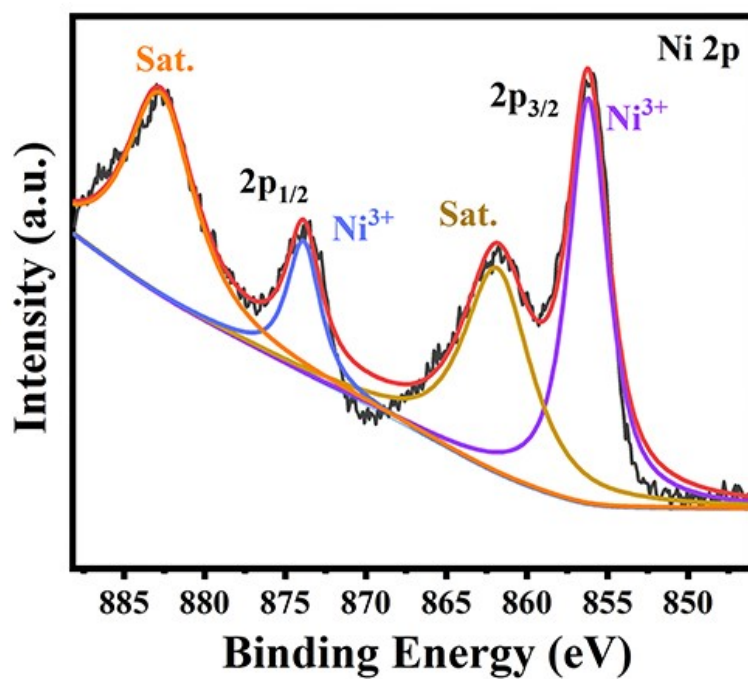

Fig. S16. Ni 2p XPS spectrum of Co<sub>0.4</sub>Ni<sub>1.6</sub>P-CeO<sub>2</sub>/NF after 20 h stability test.

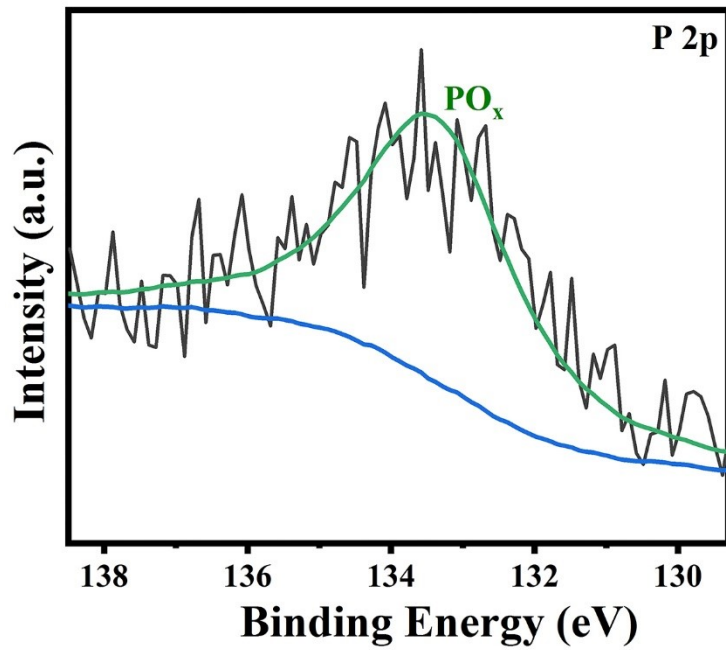

Fig. S17. P 2p XPS spectrum of  $\text{Co}_{0.4}\text{Ni}_{1.6}\text{P-CeO}_2/\text{NF}$  after 20 h stability test.

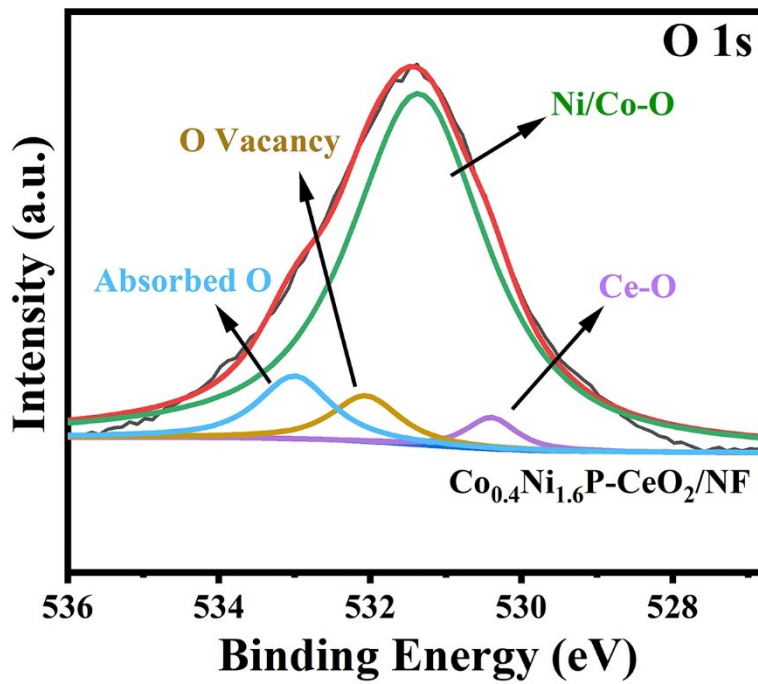

Fig. S18. O 1s XPS spectrum of  $\text{Co}_{0.4}\text{Ni}_{1.6}\text{P-CeO}_2/\text{NF}$  after 20 h stability test.

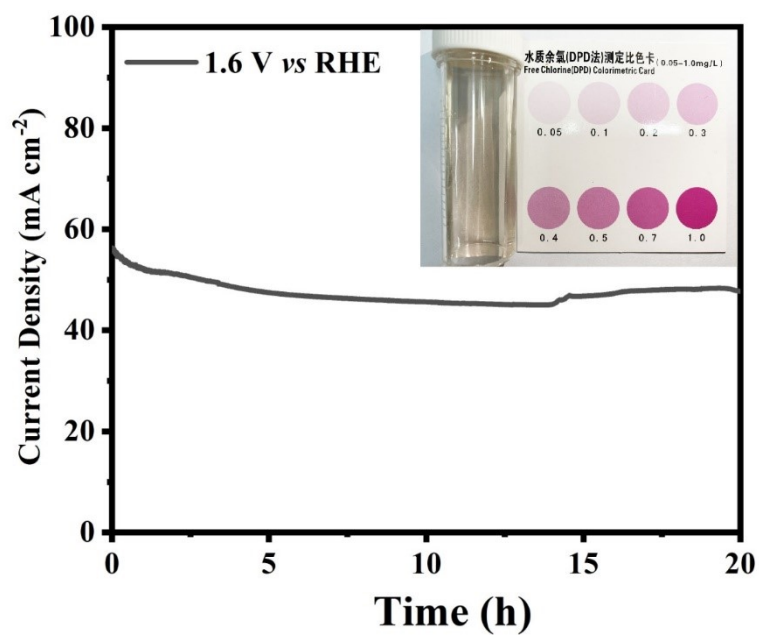

**Fig. S19.** Chronoamperometry curve of  $\text{Co}_{0.4}\text{Ni}_{1.6}\text{P}/\text{NF}$  at a fixed potential of 1.6 V vs RHE for 20 h.

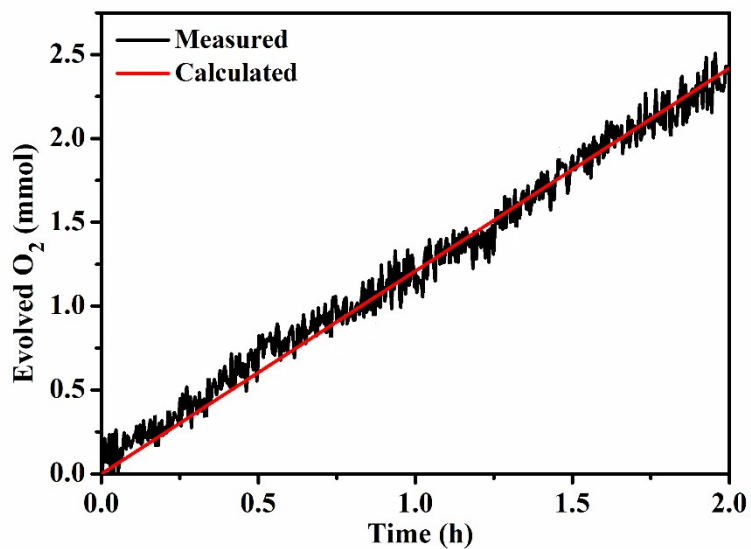

**Fig. S20.** The amounts of the theoretically calculated and experimentally measured  $\text{O}_2$  vs electrolysis time for  $\text{Co}_{0.4}\text{Ni}_{1.6}\text{P}-\text{CeO}_2/\text{NF}$  at a constant potential of 1.6 V vs RHE during the initial 2 h.

**Table S1.** Comparisons of the electrocatalytic activities and stabilities of Co<sub>0.4</sub>Ni<sub>1.6</sub>P-CeO<sub>2</sub>/NF and other CeO<sub>2</sub>-based composites studied in previous studies.

| Electrocatalysts                                           | Electrolyte | $\eta_{10}$ (mV) | $\eta_{100}$ (mV) | Tafel slope (mV dec <sup>-1</sup> ) | Ref.      |
|------------------------------------------------------------|-------------|------------------|-------------------|-------------------------------------|-----------|
| Co <sub>0.4</sub> Ni <sub>1.6</sub> P-CeO <sub>2</sub> /NF | 1 M KOH     | 268              | 343               | 79.3                                | This work |
| CeO <sub>2</sub> @Co <sub>2</sub> N                        | 1 M KOH     | 219              | 345               | 95.8                                | 1         |
| FeOOH/CeO <sub>2</sub>                                     | 1 M KOH     | 230              | —                 | 92.3                                | 2         |
| CeO <sub>x</sub> /NiCo <sub>2</sub> S <sub>4</sub>         | 1 M KOH     | 270              | ~530              | 126                                 | 3         |
| CeO <sub>x</sub> /CoS@L-CeO <sub>2</sub>                   | 1 M KOH     | 238              | ~370              | 42                                  | 4         |
| CeO <sub>2</sub> /CoSe <sub>2</sub>                        | 0.1 M KOH   | 288              | —                 | 44                                  | 5         |
| CeO <sub>x</sub> /CoO <sub>x</sub>                         | 1 M NaOH    | 313              | —                 | 66                                  | 6         |
| CoP/CeO <sub>2</sub>                                       | 1 M KOH     | 224              | ~380              | 90.3                                | 7         |
| h-Co <sub>3</sub> O <sub>4</sub> /CeO <sub>2</sub> @N-CNFs | 0.1 M KOH   | 310              | —                 | 89                                  | 8         |
| Cu@CeO <sub>2</sub> @NFC                                   | 1 M KOH     | 230.8            | ~340              | 32.7                                | 9         |
| CeO <sub>2</sub> /Co <sub>3</sub> O <sub>4</sub>           | 1 M KOH     | 265              | —                 | 68.1                                | 10        |
| Ce-MnCo <sub>2</sub> O <sub>4</sub>                        | 1 M KOH     | 337              | —                 | 125                                 | 11        |
| CeO <sub>x</sub> /CoS                                      | 1 M KOH     | 269              | 418               | 50                                  | 12        |
| V-CoP@a-CeO                                                | 1 M KOH     | 230              | 480               | 48.1                                | 13        |
| Ce doping NiFe-LDH                                         | 1 M KOH     | 242              | ~380              | 34                                  | 14        |
| CeO <sub>2</sub> /Co(OH) <sub>2</sub>                      | 1 M KOH     | 410              | ~595              | 66                                  | 15        |
| Ce-NiO-L                                                   | 1 M KOH     | 382              | ~580              | 118.7                               | 16        |
| CeO <sub>2</sub> @CeNC                                     | 1 M KOH     | 235              | 430               | 128.8                               | 17        |
| CeO <sub>x</sub> /CoP/NF                                   | 1 M KOH     | 264              | 380               | 82                                  | 18        |

## References

- 1 J. Zhang, W. He, H. B. Aiyappa, T. Quast, S. Dieckhöfer, D. Öhl, Y. T. Chen, J. Masa and W. Schuhmann, *Adv. Mater. Interfaces*, 2021, **8**, 2100041.
- 2 J. X. Feng, S. H. Ye, H. Xu, Y. X. Tong and G. R. Li, *Adv. Mater.*, 2016, **28**, 4698-4703.
- 3 X. Wu, Y. Yang, T. Zhang, B. Wang, H. Xu, X. Yan and Y. Tang, *ACS Appl. Mater. Interf.*, 2019, **11**, 39841-39847.
- 4 H. Xu, Y. Yang, X. Yang, J. Cao, W. Liu and Y. Tang, *J. Mater. Chem. A*, 2019, **7**, 8284-8291.
- 5 Y. R. Zheng, M. R. Gao, Q. Gao, H. H. Li, J. Xu, Z. Y. Wu and S. H. Yu, *Small*, 2015, **11**, 182-188.
- 6 J. H. Kim, K. Shin, K. Kawashima, D. H. Youn, J. Lin, T. E. Hong, Y. Liu, B. R. Wygant, J. Wang and G. Henkelman, *ACS Catal.*, 2018, **8**, 4257-4265.
- 7 M. Li, X. Pan, M. Jiang, Y. Zhang, Y. Tang and G. Fu, *Chem. Eng. J.*, 2020, **395**, 125160.
- 8 T. Li, S. Li, Q. Liu, Y. Tian, Y. Zhang, G. Fu and Y. Tang, *ACS Sust. Chem. Eng.*, 2019, **7**, 17950-17957.
- 9 J. Xia, H. Zhao, B. Huang, L. Xu, M. Luo, J. Wang, F. Luo, Y. Du and C. H. Yan, *Adv. Funct. Mater.*, 2020, **30**, 1908367.
- 10 B. Qiu, C. Wang, N. Zhang, L. Cai, Y. Xiong and Y. Chai, *ACS Catal.*, 2019, **9**, 6484-6490.
- 11 X. Huang, H. Zheng, G. Lu, P. Wang, L. Xing, J. Wang and G. Wang, *ACS Sustainable Chem. Eng.*, 2019, **7**, 1169-1177.
- 12 H. Xu, J. Cao, C. Shan, B. Wang, P. Xi, W. Liu and Y. Tang, *Angew. Chem., Int. Ed.*, 2018, **57**, 8654-8658.
- 13 L. Yang, R. Liu and L. Jiao, *Adv. Funct. Mater.*, 2020, **30**, 1909618.
- 14 H. Xu, C. Shan, X. Wu, M. Sun, B. Huang, Y. Tang and C. H. Yan, *Energy Environ. Sci.*, 2020, **13**, 2949-2956.
- 15 M. C. Sung, G. H. Lee and D. W. Kim, *J. Alloys Compd.*, 2019, **800**, 450-455.
- 16 W. Gao, Z. Xia, F. Cao, J. C. Ho, Z. Jiang and Y. Qu, *Adv. Funct. Mater.*, 2018, **8**, 1706056.
- 17 B. Wang, P. Xi, C. Shan, H. Chen, H. Xu, K. Iqbal, W. Liu and Y. Tang, *Adv. Mater. Interfaces*, 2017, **4**, 1700272.
- 18 T. Zhang, X. Wu, Y. Fan, C. Shan, B. Wang, H. Xu and Y. Tang, *ChemNanoMat*, 2020, **6**, 1119-1126.
